# Supplementary material
Source: PubMed Central journal article supplement (PMC6401226)
Supplement: NIHMS1518746-supplement-1.pdf [file NIHMS1518746-supplement-1.pdf]

## Supplementary Figures

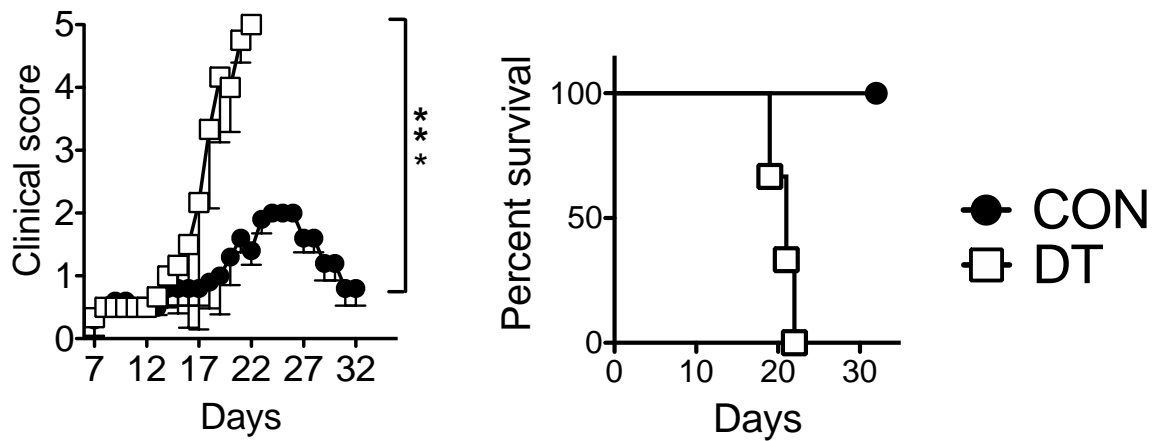

### Supplementary Figure S1. Treg-dependent protection from lethal EAE following suboptimal MOG immunization.

Foxp3<sup>DTR</sup> mice (n= 3~5) were induced for mild EAE with immunization of suboptimal dose (150 $\mu$ g) of MOG peptide in CFA. Pertussis toxin was subsequently injected to induce disease as described in Materials and Methods. DTx was injected on day 7 to deplete Tregs. Shown are the clinical score and percent survival. \*\*\*, p<0.001.

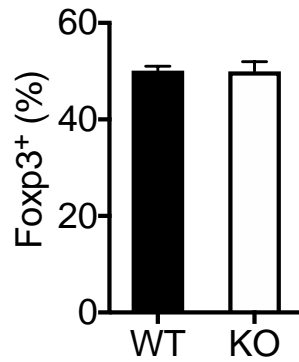

**Supplementary Figure S2. Foxp3 expression of adoptively transferred iTregs.**

Foxp3<sup>DTR</sup> mice (n= 4) were induced for EAE. CD45.2+ WT and CD45.1+ Lag3<sup>-/-</sup> iTregs were generated in vitro, FACS sorted, and Cell-trace labeled. Equal numbers of each population were transferred (day 8 post induction) into Foxp3DTR mice that were injected with DTx one day prior to transfer. Mice were sacrificed 2 days later, and draining LN cells were harvested. Foxp3 expression of the transferred Tregs was determined by intracellular staining.
